# Supplementary material
Source: Springer Nature journal article supplement (https://www.springermedizin.de/resource/supplementary/13058_2012_2929_MOESM2_ESM.pdf/9702866)

# MCF-7

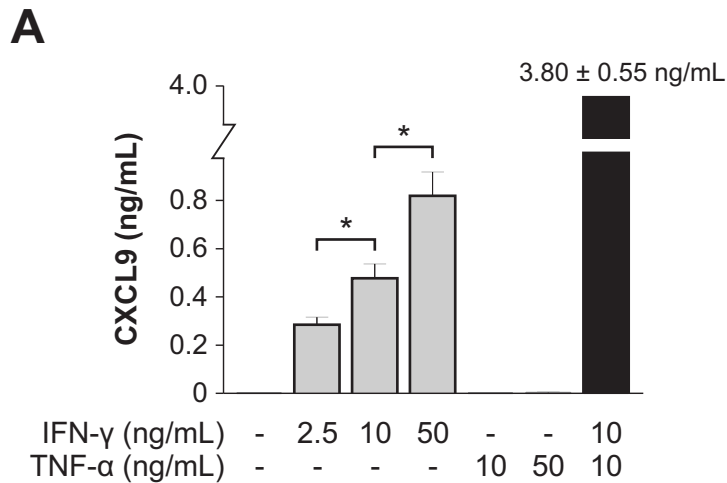

# MDA-MB 231

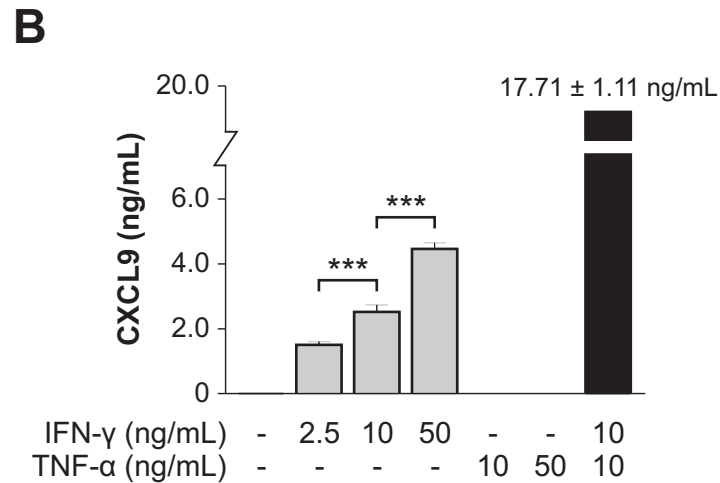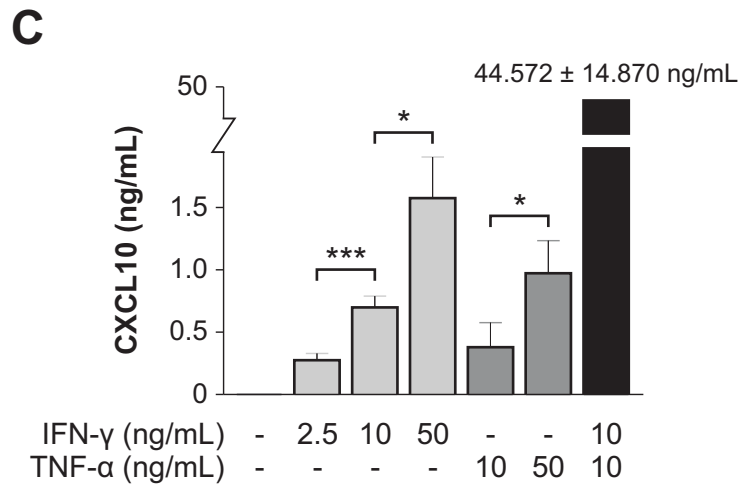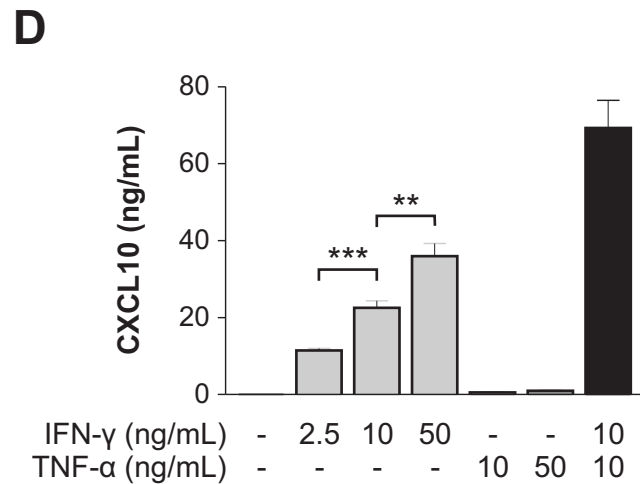

Supplement: MOESM2 [file 9702866]
